# Supplementary material for: Emission Inventory Development for Spatiotemporal Release of Vanadium from Anthropogenic Sources in China
Source: Copernicus journal article supplement (doi:10.5194/egusphere-2024-10), 2024-02-02
Supplement: Supplementary file 1 [file egusphere-2024-10-supplement.pdf]

*Supplement of*

# **Emission Inventory Development for Spatiotemporal Release of Vanadium from Anthropogenic Sources in China**

*Han Zhang et al.*

*Correspondence to:* Baogang Zhang (baogangzhang@cugb.edu.cn) & Yi Xing (xingyi@ustb.edu.cn)

## **S1. Calculation procedure for vanadium emission pertinent to coal combustion**

The development of vanadium emission inventories utilized collected raw data set from various resources, which were processed in streamlined procedure as illustrated in the following sections, and the raw data set have been provided in the data spreadsheet (denoted as SS-A\B\C\D\E), uploaded in the public repository (Zhang, 2023).

The coal combustion was common in many sectors, such as power plants, industrial productions, residential, and various other processes. Both raw coal and coke reported contained vanadium contents (Lee et al., 2002). Combustion of raw coal usually involves operation of various types of coal-fed boilers (Tian et al., 2010), from which vanadium bearing fly ash went through the downstream flue gas control device and were partially removed, the remaining flue gas was emitted into the atmosphere through the stacks (Tian et al., 2012). Coke was primarily used in coal-fired plants as secondary fuels, or steelmaking processes (Visschedijk et al., 2013), inducing vanadium emission predominantly through air pathway (Moreno et al., 2010).

The anthropogenic vanadium emission induced by coal consumption can be attained through the following method (Bai et al., 2021):

$$E(t) = \sum_i \sum_j [A_{ij}(t) \times C_{ij}(t) \times R_i \times (1 - \varphi_i)] \quad (S1-1)$$

Where  $E(t)$  was the total amount of vanadium emission due to coal consumption at year  $t$ ;  $A$  represented the yearly consumption of coal type  $j$  (raw coal or coke) in province  $I$ ;  $C$  was the vanadium content in coal type  $j$  in province  $i$ ;  $R$  was the vanadium fraction of released gas from combustion process;  $\varphi$  was the removal efficiency of flue gas vanadium in the treatment system. Supplementary spreadsheet SS-A1 provided the vanadium content in raw coal produced in each province. SS-A2 provided the vanadium fraction of flue gas from four classic coal combustion boilers. SS-A3 provided the vanadium removal efficiency of typical flue gas treatment system.

### **S1.1 Raw coal**

Massive amount of raw coal was transported across province from production area to the consumption area, which led to great variability in properties and trace content between produced coal and consumed coal in the same province. The

weighted average of V in consumed raw coal was obtained by combining the annual coal flow matrix among 31 China's province (Tian et al., 2011). V content was assumed to be consistent throughout 2015-2019, SS-A4 provided the weighted average vanadium in raw coal consumed at provincial level. SS-A5 provided the yearly consumed volume of raw coal at provincial level. The above datasets were utilized to calculate the vanadium emission inventory for raw coal and present them in **Table S1**.

### S1.2 Coke

All consumed coke in Chinese province was presumably originated from raw coal.

$$C_j = [C_y M_y \times (1 - F)] / M_j \quad (S1-2)$$

$C_j$  was the V content (g/t) in consumed coke at provincial level;  $C_y$  was the vanadium content (g/t) in the raw coal for coke production;  $M_y$  (t) was the amount of raw coal involved in coke production;  $M_j$  (t) was the total amount of coke production at provincial level;  $F$  was the vanadium fraction in released gas from coke production (Helble et al., 1996; Chen et al., 2007; Koniecznyński et al., 2012; Lin et al., 2020). SS-A6 provided the coke consumption at provincial level during 2015-2019. SS-A7 provided the average vanadium content in consumed coke at provincial level, which was obtained by applying formula 1-1 and 1-2. **Table S2** displayed the calculated result for vanadium emission inventory pertinent to coke consumption.

### S2. Vanadium emission inventory for stationary oil combustion

Stationary combustion process involved burning of various types of petroleum-based products, including crude oil, gasoline, diesel, fuel oil and kerosene. According to various studies, it was reasonable to assume that stationary oil combustion primarily contributed to atmospheric emission (Pacyna et al., 2007; Schlesinger et al., 2017).

$$E(t) = \sum_i \sum_j [A_{ij}(t) \times EF_{ij}(t)] \quad (S2-1)$$

$A_{ij}$  typified the annual consumption activity level;  $EF_{ij}$  was the dynamic average emission factor for anthropogenic source  $j$ ; To better reflect the dynamic impact of evolving technology on emission level (e.g., emission control technology, process technology), the following transformed normal distribution function was derived to estimate the variation in vanadium emission over years:

$$EF_p(t) = (EFA_p - EFB_p) e^{-(t-t_0)^2/2Sp^2} + EFB_p \quad (S2-2)$$

$E(t)$  was the yearly amount of vanadium emission in province  $i$  as result of oil combustion;  $EFA_p$  was the non-controllable emission factor for combustion process  $p$ ;  $EFB_p$  was the best emission factor for combustion process  $p$ ;  $Sp$  was the shape parameter of the curve for process  $p$ . Both  $EFA_p$  and  $EFB_p$  were obtained by field measurement reported in other literature.  $Sp$  was also reported previously. SS-B1 provided the parameters for estimating the dynamic emission factors in different sectors along with literature reference. SS-B2 provided the calculated dynamic vanadium emission factor for consumed

crude oil, coal oil, diesel and fuel oil from the corresponding transformed normal distribution functions. The obtained dynamic emission factors were applied for emission calculation for all provinces.

### **S2.1 Crude oil**

SS-B3 provided the oil consumption at provincial level during 2015-2019. **Table S3** presented the vanadium emission pertinent to crude oil combustion at provincial level during 2015-2019.

### **S2.2 Gasoline**

SS-B4 provided the consumption volume of gasoline at provincial level. **Table S4** displayed the calculated result for vanadium emission pertinent to gasoline consumption.

### **S2.3 Diesel**

SS-B5 provided the consumption volume of diesel at provincial level. **Table S5** provided the derived vanadium emission pertinent to diesel consumption.

### **S2.4 Kerosene**

SS-B6 provided the consumption volume of kerosene at provincial level. **Table S6** provided the derived vanadium emission pertinent to kerosene consumption.

### **S2.5 Fuel oil**

SS-B7 provided the consumption volume of fuel oil at provincial level. **Table S7** provided the derived vanadium emission pertinent to fuel oil consumption.

## **S3. Vanadium emission inventory for industrial processes**

Vanadium heavily involved in wide ranges of industrial processes such as steelmaking, glass production, mining activities, which discharge vanadium bearing waste into the environment. The temporal dynamic emission factors for industrial processes (steelmaking and glass production) obtained from transformed normal distribution function (2-2) were summarized in SS-B1. SS-C2, C3, C4 and C5 provided the activity levels of each province in year 2015-2019 in sectors of steelmaking, glass manufacturing, coal mining and oil extraction, respectively. The calculated results of vanadium emission inventories were obtained by applying formula 2-1 and displayed in **Table S8 - S12**.

### **S3.1 Steelmaking**

Vanadium was widely applied in the smelting furnace during steelmaking process to alter the physical properties of steel products (Lundkvist et al., 2013; Tian et al., 2015). Transformed normal distribution function was utilized to obtain the dynamic emission factor during 2015-2019 and displayed in SS-B1. Vanadium emission at provincial level was calculated in **Table S8**.

### **S3.2 Glass manufacturing**

Vanadium was extensively used in the glass manufacturing process as colorant, and emitted in flue gas as result of melting process (Kuenen et al., 2016). Transformed normal distribution function was utilized to obtain the dynamic emission factor during 2015-2019 and displayed in SS-B1. Vanadium emission at provincial level was calculated in **Table S9**.

### **S3.3 Coal mining**

Vanadium was mobilized and released during coal mining process (Schlesinger et al., 2017). Soil was the main receptor of mining induced vanadium contamination as result of surface runoff, soil leaching and seepage and dust deposition (Bhuiyan et al., 2010). The vanadium emission inventory was developed by firstly estimating the coal production activities at provincial level published in China Coal Sector Statistic Yearbook (2015-2019). 20 g/t was adopted as the estimated average vanadium content in the extracted coal, while 0.51% was used as fraction of coal subjecting to direct emission according to Pollution Source Survey (Beijing: Ministry of Ecology and Environment, 2017). The provincial data for above parameters was lacking. The activity level at provincial level was provided in SS-C3. The vanadium emission amount was estimated and provided in **Table S10**.

### **S3.4 Oil extraction**

Oil exploration activities acted as another route for vanadium mobilization from earth crust, leading to soil pollution (Lashari et al., 2023). The average vanadium content was estimated based on procedures introduced in previous study for heavy crude oil. As a result, 28.9 mg/kg was adopted in our study (Pacyna et al., 2001). The release fraction was determined based on Pollution Source Survey for oil extraction (Beijing: Ministry of Ecology and Environment, 2017). The activity level of crude oil production was provided in SS-C5. **Table S11** provided the calculated vanadium emission for petroleum production.

### **S3.5 Vanadium mining**

The impact of vanadium mining was highlighted in this study due to the increasing demand in vanadium throughout various industrial sectors, which caused significant level of soil pollution (Hao et al., 2021). The vanadium ore grades (vanadium

fraction) were obtained from provinces with major vanadium deposition. For the other province, default value 0.15% was employed (ore grade < 0.1% was not eligible for mining). The summarized ore grades were displayed in SS-C6. Default value 0.51 % was adopted as fraction of vanadium ore subjected to direct release according to Pollution Source Survey (Beijing: Ministry of Ecology and Environment, 2017). The activity level of vanadium mining was provided in SS-C7. **Table S12** presented the vanadium emission for vanadium mining.

#### **S4. Vanadium emission inventory for transportation**

Vanadium emission could also be attributed to transportation sources, mainly including road vehicles and sea vessels, which discharges vanadium bearing particulate into the atmospheric environment (Spada et al., 2018; Bai et al., 2021). Vanadium based catalysts were also employed extensively to selectively reduce the nitrogen oxides from engine worldwide, leading to vanadium release into atmosphere (Liu et al., 2015). According to Yearbook of Transportation and Automobile Industry (National Bureau of Statistics of China, 2020), the dramatic increase in numbers of car purchase, logistic flow, and operating highway have led to increased consumption in different types of oil, which were the mobile source for vanadium emission. The activity levels of oil consumption by transportation (gasoline, diesel, fuel oil) were summarized yearly in SS-D1. Here, we applied the universal values to reflect the activity level due to lack of data collection from each province. We also made assumption that gasoline, diesel oil and fuel oil was consumed in patterns similar to that in stationary source through combustion, therefore, same emission factors were applied for calculating the vanadium emission inventory for mobile source. All corresponded vanadium emission was calculated and displayed in **Table S13**.

#### **S5. Vanadium emission inventory for waste disposal**

Vanadium was abundantly detected in waste handling processes, including industrial solid waste, MSW incineration, MSW landfilling, municipal sludge disposal, and wastewater discharge (Mukherjee and Gupta, 1993; Bhatnagar et al., 2008; Pasko and Mochalova, 2014; Milik et al., 2017; Blokhina et al., 2018). Industrial solid waste, municipal solid waste, and sludges were disposed in waste heap or landfill, which was subjected to seepage process, leading to soil pollution (Schlesinger et al., 2017). Moreover, vanadium was also detected in surface water due to municipal wastewater discharge (Topal and Topal, 2023). The following section offered the calculation procedures for developing vanadium emission inventory pertinent to waste disposal.

##### **S5.1 Industrial solid waste**

The volumes of generated industrial solid waste at provincial level were provided in SS-E1. 0.30 µg/g was adopted to indicate the average vanadium content in generated solid waste (Nriagu and Pacyna, 1988). Vanadium emissions were calculated at

provincial level during 2015-2019, and displayed in **Table S14**.

### **S5.2 MSW incineration**

SS-E2 provided the dynamic vanadium emission factors applying the transformed normal distribution function of vanadium emission. SS-E3 provided the yearly volume of incinerated wastes throughout 2015-2019; **Table S15** displayed the calculated total amount of vanadium emission at provincial level.

### **S5.3 MSW landfilling**

The default value 0.70  $\mu\text{g/g}$  was used for universal emission factor (Nriagu and Pacyna, 1988). SS-E4 provided the amount of MSW admitted to landfill during 2015-2019. **Table S16** provided the total amount of vanadium discharged into environment from landfill at provincial level.

### **S5.4 Sludge disposal**

The default value of emission factor 11.0  $\mu\text{g/g}$  was obtained from literature (Nriagu and Pacyna, 1988). The total amount of sludge generation was calculated based on discharge fraction of hazardous waste (0.51%) according to Pollution Source Survey (Beijing: Ministry of Ecology and Environment, 2017), yielding the following results throughout 2015-2019 displayed in SS-E5. **Table S17** provided the total amount of vanadium emission pertinent to sludge generation throughout 2015-2019.

### **S5.5 Municipal wastewater**

The default value 0.3  $\text{ng/L}$  was obtained from literature (Nriagu and Pacyna, 1988). SS-E6 provided the provincial level wastewater discharge during 2015-2019. Based on the result, **Table S18** provided the total amount of vanadium discharge into the water environment during 2015-2019.

**Table S1.** Vanadium emission pertinent to raw coal combustion.

| Province       | V emission from raw coal consumption (t) |         |         |         |         | Cumulative V |
|----------------|------------------------------------------|---------|---------|---------|---------|--------------|
|                | 2015                                     | 2016    | 2017    | 2018    | 2019    |              |
| Beijing        | 32.86                                    | 23.9    | 13.83   | 7.79    | 5.16    | 83.54        |
| Tianjin        | 135.36                                   | 126.15  | 115.58  | 114.31  | 112.32  | 603.72       |
| Hebei          | 1049.57                                  | 1019.2  | 994.23  | 1073.16 | 1042.15 | 5178.31      |
| Shanxi         | 1094.61                                  | 1050.55 | 1266.47 | 1443.36 | 1513.89 | 6368.88      |
| Inner Mongolia | 1044.2                                   | 1049.22 | 1104.16 | 1262.73 | 1402.84 | 5863.15      |
| Liaoning       | 569.05                                   | 556.17  | 577.29  | 587.7   | 614.17  | 2904.38      |
| Jilin          | 405.96                                   | 389.88  | 387.3   | 354.12  | 361.47  | 1898.73      |
| Heilongjiang   | 539.97                                   | 564.15  | 581.62  | 537.47  | 568.5   | 2791.71      |
| Shanghai       | 135.45                                   | 132.51  | 131.14  | 126.64  | 121.42  | 647.16       |
| Jiangsu        | 695.94                                   | 717.4   | 680.88  | 649.86  | 636.93  | 3381.01      |
| Zhejiang       | 381.71                                   | 385.09  | 393.74  | 391.48  | 377.59  | 1929.61      |
| Anhui          | 428.08                                   | 429.65  | 439.37  | 455.45  | 456.18  | 2208.73      |
| Fujian         | 218.77                                   | 194.96  | 215.43  | 244.44  | 248.99  | 1122.59      |
| Jiangxi        | 441.52                                   | 436.89  | 445.13  | 451.81  | 458.59  | 2233.94      |
| Shandong       | 1554.11                                  | 1554.58 | 1449.22 | 1606.99 | 1637.88 | 7802.78      |
| Henan          | 1283.9                                   | 1257.2  | 1227.04 | 1208.82 | 1085.01 | 6061.97      |
| Hubei          | 558.68                                   | 554.88  | 559.21  | 527.07  | 558.8   | 2758.64      |
| Hunan          | 1439.79                                  | 1478.72 | 1602.9  | 1411.37 | 1377.99 | 7310.77      |
| Guangdong      | 533.67                                   | 519.13  | 552.49  | 549.12  | 541.6   | 2696.01      |
| Guangxi        | 330.35                                   | 356.08  | 361.3   | 400.99  | 438.26  | 1886.98      |
| Henan          | 32.92                                    | 31.18   | 33.76   | 35.7    | 34.71   | 168.27       |
| Chongqing      | 531.16                                   | 498.41  | 495.98  | 450.56  | 441.19  | 2417.3       |
| Sichuan        | 652.58                                   | 623.11  | 551.9   | 526.6   | 541.9   | 2896.09      |
| Guizhou        | 1373.59                                  | 1460.2  | 1435.26 | 1285.24 | 1306.23 | 6860.52      |
| Yunnan         | 959.26                                   | 927.96  | 896.87  | 920.64  | 936.85  | 4641.58      |
| Tibet          | NA                                       | NA      | NA      | NA      | NA      | NA           |
| Shaanxi        | 1112.5                                   | 1191.04 | 1215.19 | 1174.4  | 1304.75 | 5997.88      |
| Gansu          | 138.48                                   | 134.69  | 134.33  | 144.01  | 143.82  | 695.33       |
| Qinghai        | 36.93                                    | 48.06   | 42.78   | 40.15   | 37.76   | 205.68       |
| Ningxia        | 125.55                                   | 122.14  | 155.87  | 179.17  | 193.44  | 776.17       |
| Xinjiang       | 260.2                                    | 284.57  | 305.33  | 326.61  | 355.27  | 1531.98      |
| Hongkong       | NA                                       | NA      | NA      | NA      | NA      | NA           |
| Hainan         | NA                                       | NA      | NA      | NA      | NA      | NA           |

**Table S2.** Vanadium emission pertinent to coke combustion.

| Province       | V emission from coke consumption (t) |        |        |        |        |              |
|----------------|--------------------------------------|--------|--------|--------|--------|--------------|
|                | 2015                                 | 2016   | 2017   | 2018   | 2019   | Cumulative V |
| Beijing        | 0.02                                 | 0.01   | 0.01   | 0      | 0      | 0.04         |
| Tianjin        | 43.77                                | 42.35  | 39.12  | 41.67  | 43.59  | 210.5        |
| Hebei          | 327.02                               | 256.34 | 277.84 | 309.58 | 317.21 | 1487.99      |
| Shanxi         | 51                                   | 51.4   | 49.74  | 58.18  | 62.89  | 273.21       |
| Inner Mongolia | 70.05                                | 47.34  | 47.2   | 60.8   | 67.65  | 293.04       |
| Liaoning       | 107.29                               | 103.22 | 114.4  | 117.27 | 121.87 | 564.05       |
| Jilin          | 17.37                                | 15.96  | 15.35  | 19.47  | 21.55  | 89.7         |
| Heilongjiang   | 7.94                                 | 7.46   | 8.85   | 13.39  | 15.34  | 52.98        |
| Shanghai       | 31.97                                | 28.49  | 28.65  | 29.85  | 30.61  | 149.57       |
| Jiangsu        | 80                                   | 88.2   | 88.93  | 90.81  | 109.6  | 457.54       |
| Zhejiang       | 21.67                                | 15.72  | 15.49  | 15.52  | 14.56  | 82.96        |
| Anhui          | 28.57                                | 28.1   | 23.93  | 25.92  | 26.87  | 133.39       |
| Fujian         | 13.53                                | 12.87  | 13.56  | 16.3   | 18.03  | 74.29        |
| Jiangxi        | 53.84                                | 47.59  | 49.21  | 52.21  | 53.51  | 256.36       |
| Shandong       | 122                                  | 86.76  | 109.51 | 97.59  | 108.74 | 524.6        |
| Henan          | 120.27                               | 129.04 | 106.25 | 63.97  | 66.2   | 485.73       |
| Hubei          | 47.76                                | 48.99  | 46.15  | 49.89  | 48.82  | 241.61       |
| Hunan          | 161.54                               | 132.59 | 132.81 | 135.02 | 137.19 | 699.15       |
| Guangdong      | 27.52                                | 37.35  | 45.52  | 44.84  | 47.49  | 202.72       |
| Guangxi        | 51.6                                 | 60.53  | 63.06  | 54.41  | 56.97  | 286.57       |
| Hainan         | 0                                    | 0      | 0      | 0      | 0      | 0            |
| Chongqing      | 23.33                                | 32.57  | 30.17  | 22.42  | 25.63  | 134.12       |
| Sichuan        | 126.44                               | 115.48 | 116    | 82.28  | 91.94  | 532.14       |
| Guizhou        | 30.23                                | 22.48  | 19.9   | 18.99  | 20.51  | 112.11       |
| Yunnan         | 106.97                               | 107.17 | 114.83 | 126.82 | 134.33 | 590.12       |
| Tibet          | 0                                    | 0      | 0      | 0      | 0      | 0            |
| Shaanxi        | 72.27                                | 62.65  | 63.38  | 58.04  | 57.01  | 313.35       |
| Gansu          | 12.18                                | 10.73  | 10.18  | 9.47   | 10.51  | 53.07        |
| Qinghai        | 12.63                                | 6.21   | 5.93   | 6.33   | 6.4    | 37.5         |
| Ningxia        | 6.7                                  | 5.89   | 7.36   | 7.84   | 8.65   | 36.44        |
| Xinjiang       | 14.51                                | 15.93  | 19.62  | 19.58  | 19.93  | 89.57        |



**Table S3.** Vanadium emission pertinent to crude oil consumption.

| Province       | V emission from crude oil consumption (t) |         |         |         |         |              |
|----------------|-------------------------------------------|---------|---------|---------|---------|--------------|
|                | 2015                                      | 2016    | 2017    | 2018    | 2019    | Cumulative V |
| Beijing        | 108.98                                    | 88.14   | 94.55   | 95.88   | 98.16   | 485.71       |
| Tianjin        | 177.69                                    | 153.91  | 172.12  | 177.53  | 177.4   | 858.65       |
| Hebei          | 183.19                                    | 189.16  | 163.36  | 179.24  | 228.12  | 943.07       |
| Shanxi         | 0                                         | 0       | 0       | 0       | 0       | 0            |
| Inner Mongolia | 42.17                                     | 45.04   | 47.91   | 38.1    | 44.91   | 218.13       |
| Liaoning       | 707.78                                    | 757.65  | 755.7   | 862.58  | 1036.57 | 4120.28      |
| Jilin          | 105.55                                    | 112.87  | 108.89  | 98.41   | 108.48  | 534.2        |
| Heilongjiang   | 233.43                                    | 237.31  | 201.84  | 163.27  | 160.79  | 996.64       |
| Shanghai       | 277.63                                    | 265.64  | 264.06  | 242.83  | 272.09  | 1322.25      |
| Jiangsu        | 420.19                                    | 439.33  | 409.53  | 427.78  | 431.75  | 2128.58      |
| Zhejiang       | 312.88                                    | 286.37  | 321.89  | 291.28  | 363.77  | 1576.19      |
| Anhui          | 75.9                                      | 57.89   | 79.62   | 76.59   | 69.03   | 359.03       |
| Fujian         | 237.93                                    | 224.32  | 220.73  | 225.48  | 268.13  | 1176.59      |
| Jiangxi        | 61.1                                      | 77.92   | 74.09   | 80.76   | 82.55   | 376.42       |
| Shandong       | 945.96                                    | 1095.46 | 1216.85 | 1370.81 | 1428.14 | 6057.22      |
| Henan          | 93.12                                     | 75.93   | 69.75   | 87.15   | 83.77   | 409.72       |
| Hubei          | 142.77                                    | 133.09  | 151.37  | 149.4   | 158.87  | 735.5        |
| Hunan          | 96.55                                     | 90.36   | 81.58   | 99.87   | 97.97   | 466.33       |
| Guangdong      | 538.49                                    | 541.58  | 551.83  | 622.64  | 590.03  | 2844.57      |
| Guangxi        | 157.03                                    | 143.91  | 165.57  | 168.19  | 171.58  | 806.28       |
| Hainan         | 122.67                                    | 120.1   | 103.81  | 111.56  | 119.24  | 577.38       |
| Chongqing      | 0                                         | 0       | 0       | 0       | 0       | 0            |
| Sichuan        | 108.76                                    | 96.92   | 101.31  | 75.7    | 105.83  | 488.52       |
| Guizhou        | 0                                         | 0       | 0       | 0       | 0       | 0            |
| Yunnan         | 0                                         | 0       | 42.58   | 106.21  | 113.83  | 262.62       |
| Tibet          | 0                                         | 0       | 0       | 0       | 0       | 0            |
| Shaanxi        | 230.92                                    | 195.81  | 196.35  | 196.04  | 192.53  | 1011.65      |
| Gansu          | 158.98                                    | 146.79  | 154.67  | 152.9   | 155.04  | 768.38       |
| Qinghai        | 16.96                                     | 16.05   | 16.16   | 14.99   | 16.39   | 80.55        |
| Ningxia        | 52.44                                     | 61.88   | 62.64   | 47.19   | 48.15   | 272.3        |
| Xinjiang       | 273.61                                    | 263.34  | 268.22  | 252.86  | 248.97  | 1307         |

**Table S4.** Vanadium emission pertinent to gasoline consumption.

| Province       | V emission from gasoline consumption (t) |        |        |        |        | Cumulative V |
|----------------|------------------------------------------|--------|--------|--------|--------|--------------|
|                | 2015                                     | 2016   | 2017   | 2018   | 2019   |              |
| Beijing        | 61.38                                    | 61.25  | 63.12  | 63.24  | 63.99  | 312.98       |
| Tianjin        | 34.98                                    | 35.75  | 35.24  | 35.06  | 36.34  | 177.37       |
| Hebei          | 63.05                                    | 64.44  | 63.58  | 62.76  | 54.06  | 307.89       |
| Shanxi         | 27.65                                    | 29.73  | 33.21  | 30.14  | 31.63  | 152.36       |
| Inner Mongolia | 40.56                                    | 46     | 46.01  | 45.23  | 46.97  | 224.77       |
| Liaoning       | 98.52                                    | 102.38 | 102.07 | 109.78 | 112.43 | 525.18       |
| Jilin          | 23.61                                    | 23.27  | 26.54  | 26.22  | 23.34  | 122.98       |
| Heilongjiang   | 45.38                                    | 41.17  | 48.77  | 50.37  | 54.97  | 240.66       |
| Shanghai       | 80.61                                    | 83.06  | 85.39  | 63.29  | 63.09  | 375.44       |
| Jiangsu        | 133.17                                   | 131.83 | 134.95 | 137.49 | 138.72 | 676.16       |
| Zhejiang       | 100.02                                   | 103.78 | 110.69 | 110.47 | 100.82 | 525.78       |
| Anhui          | 60.57                                    | 66.4   | 74.05  | 80.26  | 83.79  | 365.07       |
| Fujian         | 61.69                                    | 64.43  | 68.54  | 70.19  | 71.85  | 336.7        |
| Jiangxi        | 37.67                                    | 38.37  | 42.66  | 47.98  | 51.78  | 218.46       |
| Shandong       | 96.31                                    | 96.28  | 104.26 | 88.42  | 90.32  | 475.59       |
| Henan          | 89.76                                    | 91.19  | 87.52  | 97.6   | 98.33  | 464.4        |
| Hubei          | 92.84                                    | 96.78  | 96.54  | 100.52 | 110.45 | 497.13       |
| Hunan          | 68.27                                    | 74.98  | 82.73  | 92.11  | 104.74 | 422.83       |
| Guangdong      | 163.04                                   | 195.65 | 197.14 | 199.25 | 199.41 | 954.49       |
| Guangxi        | 38.59                                    | 49.36  | 50.55  | 42.81  | 32.79  | 214.1        |
| Hainan         | 12.31                                    | 13.31  | 14.2   | 13.78  | 13.75  | 67.35        |
| Chongqing      | 26.53                                    | 28.53  | 29.98  | 45.99  | 51.11  | 182.14       |
| Sichuan        | 118.72                                   | 122.42 | 124.75 | 112    | 117.14 | 595.03       |
| Guizhou        | 39                                       | 44.75  | 49.02  | 56.1   | 59.49  | 248.36       |
| Yunnan         | 41.51                                    | 44.28  | 44.42  | 54.66  | 59.7   | 244.57       |
| Tibet          | 0                                        | 0      | 0      | 0      | 0      | 0            |
| Shaanxi        | 33.1                                     | 33.51  | 35.75  | 38.22  | 39.07  | 179.65       |
| Gansu          | 20.99                                    | 25.95  | 26.97  | 25.94  | 26.67  | 126.52       |
| Qinghai        | 5.96                                     | 7.29   | 7.74   | 7.95   | 8.53   | 37.47        |
| Ningxia        | 4.79                                     | 3.78   | 4.03   | 2.4    | 2.51   | 17.51        |
| Xinjiang       | 33.76                                    | 35.94  | 36.78  | 38.16  | 39.27  | 183.91       |

**Table S5.** Vanadium emission pertinent to diesel consumption.

| Province       | V emission from diesel consumption (t) |        |        |        |        | Cumulative V |
|----------------|----------------------------------------|--------|--------|--------|--------|--------------|
|                | 2015                                   | 2016   | 2017   | 2018   | 2019   |              |
| Beijing        | 24.19                                  | 22.49  | 22.56  | 22.91  | 20.68  | 112.83       |
| Tianjin        | 46.88                                  | 48.23  | 45.4   | 41.78  | 40.49  | 222.78       |
| Hebei          | 99.38                                  | 109.86 | 92.94  | 56.63  | 59.34  | 418.15       |
| Shanxi         | 68.61                                  | 69.81  | 72.22  | 62.69  | 63.9   | 337.23       |
| Inner Mongolia | 63.03                                  | 55.56  | 56.6   | 55.16  | 57.7   | 288.05       |
| Liaoning       | 147.14                                 | 131.36 | 133.06 | 133.37 | 133.48 | 678.41       |
| Jilin          | 46.05                                  | 44.76  | 46.36  | 46.72  | 44.22  | 228.11       |
| Heilongjiang   | 67.65                                  | 43.02  | 42.59  | 45.24  | 50.1   | 248.6        |
| Shanghai       | 74.53                                  | 73.21  | 70.92  | 56.31  | 57.4   | 332.37       |
| Jiangsu        | 108.69                                 | 106.95 | 111.13 | 112.94 | 113.33 | 553.04       |
| Zhejiang       | 128.45                                 | 114.85 | 107.21 | 97.63  | 93.32  | 541.46       |
| Anhui          | 81.16                                  | 81.09  | 81.38  | 83.72  | 88.03  | 415.38       |
| Fujian         | 59.07                                  | 55.94  | 55.89  | 56.23  | 57.94  | 285.07       |
| Jiangxi        | 71.3                                   | 71.19  | 73.14  | 75.36  | 76.5   | 367.49       |
| Shandong       | 177.12                                 | 178.25 | 199.02 | 163.2  | 170.66 | 888.25       |
| Henan          | 110.8                                  | 105.22 | 119.47 | 127.33 | 128.71 | 591.53       |
| Hubei          | 113.95                                 | 112.75 | 111.89 | 114.72 | 124.72 | 578.03       |
| Hunan          | 91.08                                  | 92.85  | 81.97  | 83.19  | 85.92  | 435.01       |
| Guangdong      | 210.63                                 | 218.27 | 215    | 214.29 | 213.62 | 1071.81      |
| Guangxi        | 76.05                                  | 70.12  | 72.45  | 62.35  | 62.24  | 343.21       |
| Hainan         | 15.5                                   | 14.1   | 14.2   | 11.54  | 11.21  | 66.55        |
| Chongqing      | 65.16                                  | 66.96  | 69.88  | 52.71  | 52     | 306.71       |
| Sichuan        | 108.08                                 | 104.3  | 105.32 | 115.58 | 116.62 | 549.9        |
| Guizhou        | 60.22                                  | 63.91  | 61.97  | 73.17  | 74.53  | 333.8        |
| Yunnan         | 77.32                                  | 78.33  | 78.29  | 80.55  | 86.02  | 400.51       |
| Tibet          | 0                                      | 0      | 0      | 0      | 0      | 0            |
| Shaanxi        | 61.78                                  | 53.34  | 48.17  | 51.32  | 48.17  | 262.78       |
| Gansu          | 44.52                                  | 39.98  | 38.59  | 37.1   | 36     | 196.19       |
| Qinghai        | 15.19                                  | 16.79  | 19.62  | 20.42  | 21.6   | 93.62        |
| Ningxia        | 16.28                                  | 16.15  | 16.44  | 15.07  | 15.4   | 79.34        |
| Xinjiang       | 84.52                                  | 84.79  | 83.47  | 74.02  | 75.6   | 402.4        |

**Table S6.** Vanadium emission pertinent to kerosene consumption.

| Province       | V emission from kerosene consumption (t) |        |        |        |        | Cumulative V |
|----------------|------------------------------------------|--------|--------|--------|--------|--------------|
|                | 2015                                     | 2016   | 2017   | 2018   | 2019   |              |
| Beijing        | 380.06                                   | 413.04 | 446.47 | 478.42 | 482.77 | 2200.76      |
| Tianjin        | 45.93                                    | 57.01  | 70.37  | 75.41  | 76.5   | 325.22       |
| Hebei          | 5.75                                     | 20.48  | 19.11  | 19.14  | 22.26  | 86.74        |
| Shanxi         | 18.51                                    | 18.74  | 22.39  | 25.1   | 31.61  | 116.35       |
| Inner Mongolia | 22.76                                    | 24.3   | 29.72  | 32.44  | 34.61  | 143.83       |
| Liaoning       | 20.92                                    | 27.1   | 30.76  | 35.64  | 36.52  | 150.94       |
| Jilin          | 1.33                                     | 14.19  | 12.07  | 22.56  | 23.3   | 73.45        |
| Heilongjiang   | 47.8                                     | 54.6   | 60.7   | 44.32  | 48.27  | 255.69       |
| Shanghai       | 357.07                                   | 407.17 | 452.23 | 485.77 | 521.43 | 2223.67      |
| Jiangsu        | 59.24                                    | 62.96  | 73.05  | 78.39  | 91.91  | 365.55       |
| Zhejiang       | 79.26                                    | 88.55  | 102.47 | 113.3  | 122.02 | 505.6        |
| Anhui          | 9.73                                     | 11.11  | 10.77  | 10.72  | 11.48  | 53.81        |
| Fujian         | 78.06                                    | 86.34  | 97.66  | 114.44 | 118.85 | 495.35       |
| Jiangxi        | 1.48                                     | 1.72   | 1.96   | 12.41  | 13.37  | 30.94        |
| Shandong       | 68.77                                    | 80.09  | 85.66  | 83.27  | 87.12  | 404.91       |
| Henan          | 47.59                                    | 51.43  | 50.17  | 56.7   | 64.1   | 269.99       |
| Hubei          | 48.78                                    | 65.78  | 67.67  | 80.49  | 88.88  | 351.6        |
| Hunan          | 36.14                                    | 38.53  | 42.12  | 43.73  | 44.99  | 205.51       |
| Guangdong      | 192.01                                   | 203.07 | 207.91 | 212.19 | 216.62 | 1031.8       |
| Guangxi        | 39.35                                    | 43.45  | 35.32  | 36.14  | 32.07  | 186.33       |
| Henan          | 59.83                                    | 73.51  | 79.51  | 88.73  | 90.66  | 392.24       |
| Chongqing      | 46.52                                    | 56.28  | 57.85  | 65.72  | 70.67  | 297.04       |
| Sichuan        | 194.21                                   | 214.63 | 218.54 | 145.02 | 148.19 | 920.59       |
| Guizhou        | 21.99                                    | 26.86  | 33.67  | 39.24  | 40.9   | 162.66       |
| Yunnan         | 63.11                                    | 71.56  | 78.91  | 84.85  | 88.31  | 386.74       |
| Tibet          | 0                                        | 0      | 0      | 0      | 0      | 0            |
| Shaanxi        | 24.07                                    | 20.87  | 34.66  | 53.97  | 63.04  | 196.61       |
| Gansu          | 4.09                                     | 5.6    | 5.56   | 6.78   | 7.26   | 29.29        |
| Qinghai        | 0.01                                     | 0.01   | 0.01   | 0.01   | 0.01   | 0.05         |
| Ningxia        | 0.01                                     | 0.01   | 0.01   | 0.01   | 0.01   | 0.05         |
| Xinjiang       | 19.53                                    | 19.59  | 52.66  | 45.9   | 42.51  | 180.19       |

**Table S7.** Vanadium emission pertinent to fuel oil consumption.

| Province       | V emission from fuel oil consumption (t) |        |         |         |         |              |
|----------------|------------------------------------------|--------|---------|---------|---------|--------------|
|                | 2015                                     | 2016   | 2017    | 2018    | 2019    | Cumulative V |
| Beijing        | 3.43                                     | 3.22   | 1.95    | 1.07    | 0.33    | 10           |
| Tianjin        | 65.72                                    | 31.51  | 28.2    | 32.53   | 34.59   | 192.55       |
| Hebei          | 36.12                                    | 37.32  | 29.9    | 84.02   | 71.79   | 259.15       |
| Shanxi         | 0.43                                     | 0.42   | 0.33    | 0.37    | 0.33    | 1.88         |
| Inner Mongolia | 7.4                                      | 2.27   | 2.59    | 1.76    | 0.86    | 14.88        |
| Liaoning       | 217.3                                    | 212.03 | 211.44  | 150.15  | 152.98  | 943.9        |
| Jilin          | 21.57                                    | 26.45  | 26.25   | 17.86   | 19.48   | 111.61       |
| Heilongjiang   | 80.07                                    | 65.59  | 49.67   | 29.85   | 14.49   | 239.67       |
| Shanghai       | 377.17                                   | 404.14 | 466.19  | 455.71  | 455.46  | 2158.67      |
| Jiangsu        | 100.35                                   | 105.37 | 170.56  | 171.08  | 110.02  | 657.38       |
| Zhejiang       | 227.78                                   | 265.01 | 276.15  | 210.52  | 210.18  | 1189.64      |
| Anhui          | 9.38                                     | 14.74  | 15.81   | 15.33   | 14.87   | 70.13        |
| Fujian         | 122.08                                   | 123.88 | 101.93  | 121.94  | 124.66  | 594.49       |
| Jiangxi        | 12.28                                    | 10.46  | 8.28    | 8.13    | 8.48    | 47.63        |
| Shandong       | 2266.94                                  | 3135.6 | 3249.01 | 1645.26 | 1450.33 | 11747.14     |
| Henan          | 49.33                                    | 47.73  | 19.51   | 21.93   | 6.76    | 145.26       |
| Hubei          | 103.85                                   | 94.61  | 90.23   | 89.61   | 102.97  | 481.27       |
| Hunan          | 64.79                                    | 65.37  | 64.88   | 62.61   | 57.46   | 315.11       |
| Guangdong      | 281.69                                   | 317.55 | 241.62  | 231.08  | 239.55  | 1311.49      |
| Guangxi        | 16.83                                    | 7.33   | 7.24    | 11.27   | 12.45   | 55.12        |
| Hainan         | 81.56                                    | 75.24  | 76.41   | 62.34   | 60.72   | 356.27       |
| Chongqing      | 9.7                                      | 9.67   | 9.88    | 11.2    | 12.74   | 53.19        |
| Sichuan        | 94.73                                    | 108.04 | 110.77  | 23.08   | 34.63   | 371.25       |
| Guizhou        | 0.29                                     | 0.36   | 0.22    | 0.28    | 0.11    | 1.26         |
| Yunnan         | 1.75                                     | 0.77   | 0.4     | 1.23    | 0.16    | 4.31         |
| Tibet          | 0                                        | 0      | 0       | 0       | 0       | 0            |
| Shaanxi        | 17.81                                    | 8.58   | 13.49   | 19.45   | 5.89    | 65.22        |
| Gansu          | 3.47                                     | 2.31   | 1.99    | 2.66    | 2.4     | 12.83        |
| Qinghai        | 0.02                                     | 0.07   | 0.15    | 0.12    | 0.14    | 0.5          |
| Ningxia        | 35.49                                    | 57.1   | 60.57   | 55.72   | 97.58   | 306.46       |
| Xinjiang       | 1.23                                     | 0.69   | 0.22    | 0.33    | 0.53    | 3            |

**Table S8.** Vanadium emission for steelmaking process.

| Province       | V emission from steel making process (t) |        |        |        |        | Cumulative V |
|----------------|------------------------------------------|--------|--------|--------|--------|--------------|
|                | 2015                                     | 2016   | 2017   | 2018   | 2019   |              |
| Beijing        | 0.02                                     | 0.02   | 0      | 0      | 0      | 0.04         |
| Tianjin        | 31.25                                    | 27.17  | 27.37  | 30.55  | 33.15  | 149.49       |
| Hebei          | 284.44                                   | 290.88 | 288.78 | 358.27 | 364.83 | 1587.2       |
| Shanxi         | 58.1                                     | 59.45  | 66.9   | 81.34  | 91.2   | 356.99       |
| Inner Mongolia | 26.21                                    | 27.38  | 29.96  | 34.85  | 40.08  | 158.48       |
| Liaoning       | 89.02                                    | 91.23  | 97.03  | 103.81 | 111.11 | 492.2        |
| Jilin          | 16.11                                    | 12.57  | 13.75  | 18.19  | 20.49  | 81.11        |
| Heilongjiang   | 6.32                                     | 5.62   | 7.6    | 11.69  | 13.53  | 44.76        |
| Shanghai       | 26.94                                    | 25.81  | 24.28  | 24.62  | 24.77  | 126.42       |
| Jiangsu        | 166.06                                   | 167.35 | 157.48 | 157.4  | 181.48 | 829.77       |
| Zhejiang       | 24.09                                    | 19.63  | 16.47  | 19.13  | 20.4   | 99.72        |
| Anhui          | 37.85                                    | 41.25  | 42.8   | 46.88  | 48.67  | 217.45       |
| Fujian         | 23.96                                    | 22.91  | 28.44  | 31.5   | 36.1   | 142.91       |
| Jiangxi        | 33.39                                    | 33.85  | 36.44  | 37.74  | 38.12  | 179.54       |
| Shandong       | 99.97                                    | 108.24 | 108.07 | 108.39 | 96     | 520.67       |
| Henan          | 43.76                                    | 43.03  | 43.36  | 43.68  | 49.82  | 223.65       |
| Hubei          | 44.1                                     | 44.21  | 43.42  | 46.39  | 54.29  | 232.41       |
| Hunan          | 27.98                                    | 27.61  | 30.83  | 34.85  | 36.03  | 157.3        |
| Guangdong      | 26.61                                    | 34.48  | 43.66  | 43.5   | 48.77  | 197.02       |
| Guangxi        | 32.41                                    | 31.86  | 34.21  | 33.88  | 40.21  | 172.57       |
| Hainan         | 0.36                                     | 0.42   | 0.01   | 0      | 0      | 0.79         |
| Chongqing      | 10.41                                    | 5.54   | 6.21   | 9.64   | 12.77  | 44.57        |
| Sichuan        | 29.42                                    | 30.32  | 30.6   | 36.26  | 41.28  | 167.88       |
| Guizhou        | 7.05                                     | 7.79   | 6.64   | 6.32   | 6.68   | 34.48        |
| Yunnan         | 21.42                                    | 21.41  | 22.92  | 29.07  | 32.54  | 127.36       |
| Tibet          | 0                                        | 0      | 0      | 0      | 0      | 0            |
| Shaanxi        | 15.52                                    | 13.97  | 17.89  | 19.8   | 21.61  | 88.79        |
| Gansu          | 12.87                                    | 9.49   | 8.47   | 12.12  | 13.26  | 56.21        |
| Qinghai        | 1.83                                     | 1.74   | 1.81   | 2.09   | 2.7    | 10.17        |
| Ningxia        | 2.75                                     | 2.4    | 3.47   | 3.81   | 4.66   | 17.09        |
| Xinjiang       | 11.87                                    | 13.13  | 16.77  | 17.45  | 18.68  | 77.9         |

**Table S9.** Vanadium emission pertinent to glass production.

| Province       | V emission from glass production (t) |      |       |       |       |              |
|----------------|--------------------------------------|------|-------|-------|-------|--------------|
|                | 2015                                 | 2016 | 2017  | 2018  | 2019  | Cumulative V |
| Beijing        | 0.05                                 | 0.05 | 0.05  | 0.05  | 0.05  | 0.25         |
| Tianjin        | 2.98                                 | 2.94 | 3.01  | 3.22  | 3.16  | 15.31        |
| Hebei          | 10.55                                | 9.87 | 10.12 | 11.55 | 15.54 | 57.63        |
| Shanxi         | 1.33                                 | 1.57 | 1.62  | 2.02  | 1.75  | 8.29         |
| Inner Mongolia | 0.96                                 | 0.95 | 0.94  | 0.99  | 0.94  | 4.78         |
| Liaoning       | 1.13                                 | 1.33 | 4.08  | 4.2   | 4.8   | 15.54        |
| Jilin          | 0.35                                 | 0.82 | 0.82  | 1.05  | 1.12  | 4.16         |
| Heilongjiang   | 0.37                                 | 0.38 | 0.38  | 0.37  | 0.38  | 1.88         |
| Shanghai       | 0                                    | 0    | 0     | 0     | 0     | 0            |
| Jiangsu        | 4.39                                 | 2.41 | 2.61  | 2.17  | 1.74  | 13.32        |
| Zhejiang       | 5.05                                 | 4.78 | 4.26  | 4.12  | 4.27  | 22.48        |
| Anhui          | 2.19                                 | 3.1  | 3.58  | 3.14  | 4.03  | 16.04        |
| Fujian         | 4.76                                 | 5.12 | 4.5   | 4.72  | 4.86  | 23.96        |
| Jiangxi        | 0.37                                 | 0.44 | 0.02  | 0.45  | 0.45  | 1.73         |
| Shandong       | 6.99                                 | 6.46 | 6.88  | 7.11  | 6.74  | 34.18        |
| Henan          | 1.12                                 | 1.06 | 1.92  | 1.88  | 1.82  | 7.8          |
| Hubei          | 8.42                                 | 8.28 | 8.34  | 8.98  | 9.77  | 43.79        |
| Hunan          | 2.04                                 | 2.54 | 2.43  | 2.36  | 3.14  | 12.51        |
| Guangdong      | 6.71                                 | 8.6  | 8.69  | 9.64  | 9.59  | 43.23        |
| Guangxi        | 0.59                                 | 0.49 | 0.27  | 0.44  | 1.13  | 2.92         |
| Hainan         | 0                                    | 0    | 0     | 0.68  | 0.49  | 1.17         |
| Chongqing      | 1.3                                  | 1.4  | 1.38  | 1.5   | 1.21  | 6.79         |
| Sichuan        | 3.98                                 | 5.1  | 5.13  | 5.79  | 5.71  | 25.71        |
| Guizhou        | 0.86                                 | 1.33 | 1.45  | 1.63  | 1.67  | 6.94         |
| Yunnan         | 0.6                                  | 0.37 | 0.31  | 1.14  | 1.66  | 4.08         |
| Tibet          | 0                                    | 0    | 0     | 0     | 0     | 0            |
| Shaanxi        | 1.73                                 | 1.95 | 2.05  | 2     | 1.94  | 9.67         |
| Gansu          | 0.12                                 | 0.58 | 0.49  | 0.51  | 0.53  | 2.23         |
| Qinghai        | 0.37                                 | 0.39 | 0.29  | 0.33  | 0.12  | 1.5          |
| Ningxia        | 0                                    | 0.05 | 0.27  | 0.39  | 0.4   | 1.11         |
| Xinjiang       | 1.05                                 | 0.66 | 0.7   | 0.76  | 0.74  | 3.91         |

**Table S10.** Vanadium emission pertinent to coal mining.

| Province       | V emission from coal mining (t) |       |      |      |      | Cumulative V |
|----------------|---------------------------------|-------|------|------|------|--------------|
|                | 2015                            | 2016  | 2017 | 2018 | 2019 |              |
| Beijing        | 0.05                            | 0.03  | 0.03 | 0.02 | 0    | 0.13         |
| Tianjin        | 0                               | 0     | 0    | 0    | 0    | 0            |
| Hebei          | 0.52                            | 0.57  | 0.61 | 0.66 | 0.76 | 3.12         |
| Shanxi         | 10.08                           | 9.45  | 8.9  | 8.47 | 9.86 | 46.76        |
| Inner Mongolia | 11.12                           | 10.11 | 9.24 | 8.63 | 9.28 | 48.38        |
| Liaoning       | 0.34                            | 0.35  | 0.37 | 0.43 | 0.48 | 1.97         |
| Jilin          | 0.13                            | 0.17  | 0.17 | 0.17 | 0.27 | 0.91         |
| Heilongjiang   | 0.55                            | 0.63  | 0.63 | 0.6  | 0.67 | 3.08         |
| Shanghai       | 0                               | 0     | 0    | 0    | 0    | 0            |
| Jiangsu        | 0.11                            | 0.13  | 0.13 | 0.14 | 0.2  | 0.71         |
| Zhejiang       | 0                               | 0     | 0    | 0    | 0    | 0            |
| Anhui          | 1.12                            | 1.16  | 1.2  | 1.25 | 1.37 | 6.1          |
| Fujian         | 0.09                            | 0.1   | 0.12 | 0.14 | 0.16 | 0.61         |
| Jiangxi        | 0.05                            | 0.06  | 0.1  | 0.16 | 0.23 | 0.6          |
| Shandong       | 1.22                            | 1.28  | 1.34 | 1.31 | 1.45 | 6.6          |
| Henan          | 1.12                            | 1.17  | 1.2  | 1.22 | 1.39 | 6.1          |
| Hubei          | 0                               | 0.01  | 0.03 | 0.06 | 0.09 | 0.19         |
| Hunan          | 0.15                            | 0.19  | 0.2  | 0.28 | 0.36 | 1.18         |
| Guangdong      | 0                               | 0     | 0    | 0    | 0    | 0            |
| Guangxi        | 0.04                            | 0.05  | 0.05 | 0.04 | 0.04 | 0.22         |
| Henan          | 0                               | 0     | 0    | 0    | 0    | 0            |
| Chongqing      | 0.12                            | 0.12  | 0.12 | 0.25 | 0.36 | 0.97         |
| Sichuan        | 0.35                            | 0.38  | 0.49 | 0.63 | 0.65 | 2.5          |
| Guizhou        | 1.34                            | 1.46  | 1.67 | 1.72 | 1.75 | 7.94         |
| Yunnan         | 0.56                            | 0.47  | 0.48 | 0.47 | 0.53 | 2.51         |
| Tibet          | 0                               | 0     | 0    | 0    | 0    | 0            |
| Shaanxi        | 6.49                            | 6.42  | 5.82 | 5.26 | 5.36 | 29.35        |
| Gansu          | 0.38                            | 0.37  | 0.38 | 0.43 | 0.45 | 2.01         |
| Qinghai        | 0.13                            | 0.08  | 0.09 | 0.08 | 0.08 | 0.46         |
| Ningxia        | 0.76                            | 0.8   | 0.78 | 0.72 | 0.81 | 3.87         |
| Xinjiang       | 2.46                            | 2.18  | 1.81 | 1.64 | 1.55 | 9.64         |



**Table S11.** Vanadium emission pertinent to oil extraction.

| Province       | V emission from oil extraction (t) |      |      |      |      | Cumulative V |
|----------------|------------------------------------|------|------|------|------|--------------|
|                | 2015                               | 2016 | 2017 | 2018 | 2019 |              |
| Beijing        | 0                                  | 0    | 0    | 0    | 0    | 0            |
| Tianjin        | 5.15                               | 4.83 | 4.57 | 4.55 | 4.59 | 23.69        |
| Hebei          | 0.86                               | 0.81 | 0.8  | 0.79 | 0.81 | 4.07         |
| Shanxi         | 0                                  | 0    | 0    | 0    | 0    | 0            |
| Inner Mongolia | 0.07                               | 0.07 | 0.02 | 0.02 | 0.02 | 0.2          |
| Liaoning       | 1.53                               | 1.5  | 1.54 | 1.53 | 1.55 | 7.65         |
| Jilin          | 0.98                               | 0.9  | 0.62 | 0.57 | 0.59 | 3.66         |
| Heilongjiang   | 5.66                               | 5.39 | 5.04 | 4.75 | 4.55 | 25.39        |
| Shanghai       | 0.01                               | 0.01 | 0.01 | 0.01 | 0.06 | 0.1          |
| Jiangsu        | 0.28                               | 0.25 | 0.23 | 0.23 | 0.23 | 1.22         |
| Zhejiang       | 0                                  | 0    | 0    | 0    | 0    | 0            |
| Anhui          | 0                                  | 0    | 0    | 0    | 0    | 0            |
| Fujian         | 0                                  | 0    | 0    | 0    | 0    | 0            |
| Jiangxi        | 0                                  | 0    | 0    | 0    | 0    | 0            |
| Shandong       | 3.84                               | 3.38 | 3.29 | 3.31 | 3.28 | 17.1         |
| Henan          | 0.61                               | 0.47 | 0.42 | 0.38 | 0.37 | 2.25         |
| Hubei          | 0.11                               | 0.09 | 0.08 | 0.08 | 0.08 | 0.44         |
| Hunan          | 0                                  | 0    | 0    | 0    | 0    | 0            |
| Guangdong      | 2.32                               | 2.29 | 2.12 | 2.05 | 2.22 | 11           |
| Guangxi        | 0.07                               | 0.07 | 0.07 | 0.08 | 0.07 | 0.36         |
| Hainan         | 0.04                               | 0.04 | 0.04 | 0.05 | 0.05 | 0.22         |
| Chongqing      | 0                                  | 0    | 0    | 0    | 0    | 0            |
| Sichuan        | 0.02                               | 0.02 | 0.01 | 0.01 | 0.01 | 0.07         |
| Guizhou        | 0                                  | 0    | 0    | 0    | 0    | 0            |
| Yunnan         | 0                                  | 0    | 0    | 0    | 0    | 0            |
| Tibet          | 0                                  | 0    | 0    | 0    | 0    | 0            |
| Shaanxi        | 5.51                               | 5.16 | 5.14 | 5.19 | 3.98 | 24.98        |
| Gansu          | 0.1                                | 0.06 | 0.07 | 0.08 | 1.33 | 1.64         |
| Qinghai        | 0.33                               | 0.33 | 0.34 | 0.33 | 0.34 | 1.67         |
| Ningxia        | 0.02                               | 0.01 | 0    | 0    | 0    | 0.03         |
| Xinjiang       | 4.12                               | 3.78 | 3.82 | 3.9  | 4.11 | 19.73        |

**Table S12.** Vanadium emission pertinent to vanadium mining.

| Province       | Yearly activity level of vanadium mining (t) |       |       |       |       | Cumulative |
|----------------|----------------------------------------------|-------|-------|-------|-------|------------|
|                | 2015                                         | 2016  | 2017  | 2018  | 2019  |            |
| Beijing        | 0                                            | 0     | 0     | 0     | 0     | 0          |
| Tianjin        | 0                                            | 0     | 0     | 0     | 0     | 0          |
| Hebei          | 4.34                                         | 6     | 5.17  | 5.59  | 5.38  | 26.48      |
| Shanxi         | 0                                            | 0     | 0     | 0     | 0     | 0          |
| Inner Mongolia | 0.01                                         | 0.02  | 0.02  | 0.02  | 0.02  | 0.09       |
| Liaoning       | 0                                            | 0     | 0     | 0     | 0     | 0          |
| Jilin          | 0                                            | 0     | 0     | 0     | 0     | 0          |
| Heilongjiang   | 0                                            | 0     | 0     | 0     | 0     | 0          |
| Shanghai       | 0                                            | 0     | 0     | 0     | 0     | 0          |
| Jiangsu        | 0.21                                         | 0.17  | 0.19  | 0.18  | 0.19  | 0.94       |
| Zhejiang       | 0.05                                         | 0.04  | 0.05  | 0.05  | 0.04  | 0.23       |
| Anhui          | 0.71                                         | 0.72  | 0.72  | 0.71  | 0.71  | 3.57       |
| Fujian         | 0                                            | 0     | 0     | 0     | 0     | 0          |
| Jiangxi        | 0.02                                         | 0.02  | 0.02  | 0.02  | 0.02  | 0.1        |
| Shandong       | 0                                            | 0     | 0     | 0     | 0     | 0          |
| Henan          | 0                                            | 0     | 0     | 0     | 0     | 0          |
| Hubei          | 4.68                                         | 4.04  | 4.36  | 4.2   | 4.28  | 21.56      |
| Hunan          | 2.8                                          | 2.9   | 2.8   | 2.8   | 2.9   | 14.2       |
| Guangdong      | 0                                            | 0     | 0     | 0     | 0     | 0          |
| Guangxi        | 0.01                                         | 0.01  | 0.01  | 0.01  | 0.01  | 0.05       |
| Hainan         | 0                                            | 0     | 0     | 0     | 0     | 0          |
| Chongqing      | 0                                            | 0     | 0     | 0     | 0     | 0          |
| Sichuan        | 23.47                                        | 34.75 | 29.11 | 31.93 | 30.52 | 149.78     |
| Guizhou        | 0                                            | 0     | 0     | 0     | 0     | 0          |
| Yunnan         | 0.03                                         | 0.03  | 0.03  | 0.03  | 0.04  | 0.16       |
| Tibet          | 0                                            | 0     | 0     | 0     | 0     | 0          |
| Shaanxi        | 0.27                                         | 0.02  | 0.02  | 0.01  | 0.01  | 0.33       |
| Gansu          | 0.03                                         | 2.24  | 2.23  | 2.23  | 2.22  | 8.95       |
| Qinghai        | 0                                            | 0     | 0     | 0     | 0     | 0          |
| Ningxia        | 0                                            | 0     | 0     | 0     | 0     | 0          |
| Xinjiang       | 0.04                                         | 0.04  | 0.04  | 0.04  | 0.04  | 0.2        |

**Table S13.** Vanadium emission pertinent to transportation.

| Process  | V emission from mobile source of oil consumption (t) |         |        |         |         | Cumulative V |
|----------|------------------------------------------------------|---------|--------|---------|---------|--------------|
|          | 2015                                                 | 2016    | 2017   | 2018    | 2019    |              |
| Gasoline | 691.05                                               | 731.01  | 779.43 | 870.65  | 961.28  | 4033.42      |
| Diesel   | 1453.67                                              | 1468.24 | 1528.3 | 1602.35 | 1518.87 | 7571.43      |
| Fuel gas | 1000.5                                               | 1055.19 | 1246.1 | 1278.76 | 1469.49 | 6050.04      |

**Table S14.** Vanadium emission pertinent to industrial solid waste disposal.

| Province       | V emission from industrial solid waste disposal (t) |       |       |       |       |              |
|----------------|-----------------------------------------------------|-------|-------|-------|-------|--------------|
|                | 2015                                                | 2016  | 2017  | 2018  | 2019  | Cumulative V |
| Beijing        | 0.35                                                | 0.39  | 0.59  | 0.68  | 0.78  | 2.79         |
| Tianjin        | 0.07                                                | 0.07  | 0.14  | 0.07  | 0.08  | 0.43         |
| Hebei          | 44.19                                               | 19.84 | 14    | 14.41 | 15.12 | 107.56       |
| Shanxi         | 33.92                                               | 57.42 | 64.5  | 76.8  | 82.21 | 314.85       |
| Inner Mongolia | 22.66                                               | 34.54 | 43.96 | 46.1  | 58.25 | 205.51       |
| Liaoning       | 24.2                                                | 14.38 | 18.1  | 16.28 | 25.53 | 98.49        |
| Jilin          | 4.71                                                | 4.03  | 4.78  | 5.42  | 4.68  | 23.62        |
| Heilongjiang   | 3.82                                                | 5.3   | 5.42  | 6.73  | 4.17  | 25.44        |
| Shanghai       | 0.22                                                | 0.23  | 0.32  | 0.5   | 0.45  | 1.72         |
| Jiangsu        | 1.22                                                | 3.97  | 3.57  | 3.62  | 2.98  | 15.36        |
| Zhejiang       | 0.62                                                | 1.81  | 1.61  | 1.35  | 1.01  | 6.4          |
| Anhui          | 3.15                                                | 3.65  | 2.18  | 3.53  | 4.72  | 17.23        |
| Fujian         | 3.47                                                | 3.29  | 4.82  | 5.31  | 5.53  | 22.42        |
| Jiangxi        | 0.82                                                | 4.69  | 3.83  | 3.66  | 4.17  | 17.17        |
| Shandong       | 2.21                                                | 3.97  | 4.95  | 5.17  | 6.9   | 23.2         |
| Henan          | 8.36                                                | 13.82 | 14.88 | 17.16 | 16.37 | 70.59        |
| Hubei          | 6.23                                                | 6.99  | 4.49  | 4.37  | 7.4   | 29.48        |
| Hunan          | 6.04                                                | 4.23  | 3.16  | 3.2   | 2.93  | 19.56        |
| Guangdong      | 1.32                                                | 1.88  | 2.11  | 2.66  | 2.78  | 10.75        |
| Guangxi        | 1.64                                                | 5.25  | 5.27  | 5.28  | 4.01  | 21.45        |
| Henan          | 0.13                                                | 0.12  | 0.68  | 0.64  | 0.6   | 2.17         |
| Chongqing      | 1.15                                                | 1.04  | 1.24  | 1.07  | 1.52  | 6.02         |
| Sichuan        | 12.53                                               | 9.29  | 4.8   | 5.21  | 6.69  | 38.52        |
| Guizhou        | 5.71                                                | 5.2   | 7.03  | 5.93  | 5.49  | 29.36        |
| Yunnan         | 12.49                                               | 22.75 | 26.6  | 29.22 | 22.23 | 113.29       |
| Tibet          | 0.12                                                | 0.28  | 0.15  | 0.52  | 0.67  | 1.74         |
| Shaanxi        | 5.93                                                | 8.07  | 18.34 | 21.53 | 20.12 | 73.99        |
| Gansu          | 6.78                                                | 5.09  | 4.43  | 4.18  | 5.47  | 25.95        |
| Qinghai        | 0.01                                                | 0.24  | 0.51  | 1.04  | 0.95  | 2.75         |
| Ningxia        | 2.79                                                | 5.73  | 8.1   | 9.83  | 8.91  | 35.36        |
| Xinjiang       | 2.27                                                | 8.16  | 8.39  | 8.42  | 8.37  | 35.61        |

**Table S15.** Vanadium emission pertinent to MSW incineration.

| Province       | V emission from MSW incineration (t) |      |      |      |      | Cumulative V |
|----------------|--------------------------------------|------|------|------|------|--------------|
|                | 2015                                 | 2016 | 2017 | 2018 | 2019 |              |
| Beijing        | 0.23                                 | 0.3  | 0.36 | 0.44 | 0.61 | 1.94         |
| Tianjin        | 0.13                                 | 0.15 | 0.15 | 0.15 | 0.21 | 0.79         |
| Hebei          | 0.24                                 | 0.32 | 0.31 | 0.38 | 0.42 | 1.67         |
| Shanxi         | 0.14                                 | 0.14 | 0.13 | 0.14 | 0.12 | 0.67         |
| Inner Mongolia | 0.03                                 | 0.04 | 0.07 | 0.1  | 0.11 | 0.35         |
| Liaoning       | 0.08                                 | 0.07 | 0.07 | 0.07 | 0.16 | 0.45         |
| Jilin          | 0.13                                 | 0.14 | 0.18 | 0.15 | 0.22 | 0.82         |
| Heilongjiang   | 0.04                                 | 0.09 | 0.11 | 0.11 | 0.14 | 0.49         |
| Shanghai       | 0.28                                 | 0.3  | 0.4  | 0.43 | 0.54 | 1.95         |
| Jiangsu        | 1.16                                 | 1.23 | 1.42 | 1.47 | 1.54 | 6.82         |
| Zhejiang       | 0.86                                 | 0.92 | 0.91 | 1.08 | 1.23 | 5            |
| Anhui          | 0.22                                 | 0.31 | 0.37 | 0.46 | 0.51 | 1.87         |
| Fujian         | 0.41                                 | 0.47 | 0.54 | 0.65 | 0.69 | 2.76         |
| Jiangxi        | 0                                    | 0.03 | 0.06 | 0.13 | 0.21 | 0.43         |
| Shandong       | 0.62                                 | 0.78 | 0.99 | 1.23 | 1.43 | 5.05         |
| Henan          | 0.17                                 | 0.17 | 0.18 | 0.23 | 0.33 | 1.08         |
| Hubei          | 0.43                                 | 0.41 | 0.43 | 0.45 | 0.47 | 2.19         |
| Hunan          | 0.05                                 | 0.13 | 0.14 | 0.34 | 0.37 | 1.03         |
| Guangdong      | 0.79                                 | 0.87 | 1.01 | 1.37 | 1.91 | 5.95         |
| Guangxi        | 0.03                                 | 0.09 | 0.14 | 0.17 | 0.25 | 0.68         |
| Hainan         | 0.1                                  | 0.14 | 0.16 | 0.15 | 0.15 | 0.7          |
| Chongqing      | 0.16                                 | 0.22 | 0.24 | 0.28 | 0.34 | 1.24         |
| Sichuan        | 0.31                                 | 0.4  | 0.5  | 0.62 | 0.78 | 2.61         |
| Guizhou        | 0.03                                 | 0.04 | 0.08 | 0.14 | 0.18 | 0.47         |
| Yunnan         | 0.21                                 | 0.27 | 0.25 | 0.28 | 0.25 | 1.26         |
| Tibet          | 0                                    | 0    | 0    | 0.03 | 0.03 | 0.06         |
| Shaanxi        | 0                                    | 0.01 | 0    | 0    | 0.02 | 0.03         |
| Gansu          | 0                                    | 0.04 | 0.1  | 0.12 | 0.14 | 0.4          |
| Qinghai        | 0                                    | 0    | 0    | 0    | 0    | 0            |
| Ningxia        | 0                                    | 0.04 | 0.04 | 0.06 | 0.07 | 0.21         |
| Xinjiang       | 0                                    | 0.01 | 0.02 | 0.02 | 0.01 | 0.06         |

**Table S16.** Vanadium emission pertinent to MSW landfilling.

| Province       | V emission from MSW landfilling (t) |       |       |       |       | Cumulative V |
|----------------|-------------------------------------|-------|-------|-------|-------|--------------|
|                | 2015                                | 2016  | 2017  | 2018  | 2019  |              |
| Beijing        | 2.28                                | 3.31  | 3.07  | 2.76  | 2.04  | 13.46        |
| Tianjin        | 0.76                                | 0.79  | 1.07  | 0.99  | 0.56  | 4.17         |
| Hebei          | 2.69                                | 2.86  | 2.74  | 2.7   | 2.71  | 13.7         |
| Shanxi         | 2.17                                | 2.24  | 2.33  | 2.42  | 2.65  | 11.81        |
| Inner Mongolia | 2.06                                | 2.12  | 2.14  | 1.79  | 2.04  | 10.15        |
| Liaoning       | 5.45                                | 5.29  | 5.1   | 5.14  | 5.71  | 26.69        |
| Jilin          | 2.03                                | 2.09  | 1.36  | 1.89  | 1.57  | 8.94         |
| Heilongjiang   | 2.22                                | 2.15  | 2.47  | 2.45  | 2.52  | 11.81        |
| Shanghai       | 2.3                                 | 2.31  | 2.59  | 2.76  | 1.51  | 11.47        |
| Jiangsu        | 2.85                                | 3.16  | 2.91  | 2.44  | 2.48  | 13.84        |
| Zhejiang       | 3.84                                | 4.19  | 4.19  | 3.18  | 2.43  | 17.83        |
| Anhui          | 2.01                                | 1.81  | 1.87  | 1.26  | 1.1   | 8.05         |
| Fujian         | 1.66                                | 1.44  | 1.89  | 1.78  | 2.11  | 8.88         |
| Jiangxi        | 2.18                                | 2.44  | 2.71  | 2.35  | 2.44  | 12.12        |
| Shandong       | 5.25                                | 4.94  | 4.59  | 3.5   | 2.8   | 21.08        |
| Henan          | 4.93                                | 5.23  | 5.75  | 5.65  | 5.83  | 27.39        |
| Hubei          | 2.44                                | 3.11  | 3.36  | 3.51  | 3.32  | 15.74        |
| Hunan          | 4.14                                | 3.96  | 4.46  | 3.56  | 2.82  | 18.94        |
| Guangdong      | 9.72                                | 10.34 | 11.38 | 12.18 | 10.82 | 54.44        |
| Guangxi        | 2.48                                | 2.3   | 2.15  | 2.19  | 1.9   | 11.02        |
| Hainan         | 0.49                                | 0.41  | 0.46  | 0.56  | 0.69  | 2.61         |
| Chongqing      | 2                                   | 2.1   | 2.17  | 2.05  | 1.58  | 9.9          |
| Sichuan        | 3.62                                | 3.59  | 3.56  | 3.08  | 3.13  | 16.98        |
| Guizhou        | 1.58                                | 1.66  | 1.64  | 1.29  | 1.25  | 7.42         |
| Yunnan         | 1.03                                | 1.09  | 1.08  | 1.23  | 1.59  | 6.02         |
| Tibet          | 0                                   | 0.29  | 0.3   | 0.16  | 0.27  | 1.02         |
| Shaanxi        | 3.53                                | 3.55  | 2.63  | 4.5   | 4.32  | 18.53        |
| Gansu          | 1.18                                | 1.08  | 1.06  | 1.12  | 0.98  | 5.42         |
| Qinghai        | 0.5                                 | 0.55  | 0.51  | 0.63  | 0.63  | 2.82         |
| Ningxia        | 0.83                                | 0.53  | 0.58  | 0.45  | 0.47  | 2.86         |
| Xinjiang       | 2.15                                | 2.13  | 2.18  | 2.38  | 2.38  | 11.22        |

**Table S17.** Vanadium emission pertinent to sludge disposal.

| Process           | V emission from sludge disposal process (t) |        |        |        |        |              |
|-------------------|---------------------------------------------|--------|--------|--------|--------|--------------|
|                   | 2015                                        | 2016   | 2017   | 2018   | 2019   | Cumulative V |
| Wastewater sludge | 322.82                                      | 301.02 | 284.14 | 266.98 | 249.96 | 1424.92      |

**Table S18.** Vanadium emission pertinent to wastewater discharge.

| Process              | yearly amount of wastewater discharge (kg) |       |       |       |       |              |
|----------------------|--------------------------------------------|-------|-------|-------|-------|--------------|
|                      | 2015                                       | 2016  | 2017  | 2018  | 2019  | Cumulative V |
| wastewater discharge | 16.05                                      | 17.13 | 17.67 | 18.24 | 18.87 | 87.96        |

**Table S19.** Uncertainties of the model input data.

| Categories                            | Input parameters                                         | Probability distribution | Range of uncertainties |
|---------------------------------------|----------------------------------------------------------|--------------------------|------------------------|
| Coal<br>combustion                    | raw coal consumption                                     | Normal                   | (-2%, 2%)              |
|                                       | coke consumption                                         | Normal                   | (-3%, 3%)              |
|                                       | V content in consumed coal                               | Lognormal                | (-21%, 21%)            |
|                                       | V content in consumed coke                               | Lognormal                | (-20%, 19%)            |
|                                       | V fraction in released gas<br>(pulverized coal boiler)   | Normal                   | (-9%, 9%)              |
|                                       | V fraction in released gas<br>(chain grate boiler)       | Normal                   | (-56%, 56%)            |
|                                       | V fraction in released gas<br>(fluidized bed combustion) | Normal                   | (-4%, 4%)              |
|                                       | V fraction in released gas<br>(coking oven)              | Uniform                  | (-105%, 108%)          |
|                                       | Removal efficiency<br>(Electrostatic dust collector)     | Triangular               | (-12%, 13%)            |
|                                       | Removal efficiency<br>(bag filter)                       | Uniform                  | (-33%, 32%)            |
|                                       | Removal efficiency<br>(cyclone remover)                  | Normal                   | (-15%, 14%)            |
|                                       | Removal efficiency<br>(wet method filter)                | Triangular               | (-20%, 20%)            |
|                                       | Removal efficiency<br>(desulfurizer)                     | Normal                   | (-37%, 38%)            |
| Oil burning<br>(stationary<br>source) | Crude oil consumption                                    | Normal                   | (-5%, 5%)              |
|                                       | Emission factor (crude oil)                              | Normal                   | (-1%, 3%)              |
|                                       | Gasoline consumption                                     | Normal                   | (-4%, 4%)              |
|                                       | Emission factor (gasoline)                               | Triangular               | (-2%, 2%)              |
|                                       | Kerosene consumption                                     | Normal                   | (-9%, 10%)             |
|                                       | Emission factor (kerosene)                               | Normal                   | (-3%, 2%)              |
|                                       | Diesel consumption                                       | Normal                   | (-1%, 1%)              |
|                                       | Emission factor (diesel)                                 | Triangular               | (-1%, 1%)              |
|                                       | Fuel oil consumption                                     | Normal                   | (-14%, 15%)            |
| Emission factor (fuel oil)            | Triangular                                               | (-1%, 1%)                |                        |
| Oil burning<br>(transportation)       | Gasoline consumption                                     | Normal                   | (-5%, 5%)              |
|                                       | Emission factor (gasoline)                               | Triangular               | (-2%, 2%)              |
|                                       | Diesel consumption                                       | Normal                   | (-3%, 4%)              |
|                                       | Emission factor (diesel)                                 | Triangular               | (-1%, 1%)              |
|                                       | Fuel oil consumption                                     | Normal                   | (-10%, 10%)            |
| Emission factor (fuel oil)            | Triangular                                               | (-1%, 1%)                |                        |
|                                       | Steel production volume                                  | Normal                   | (-7%, 7%)              |



| Categories         | Input parameters                      | Probability distribution | Range of uncertainties |
|--------------------|---------------------------------------|--------------------------|------------------------|
| Industrial process | Emission factor (steel production)    | Normal                   | (-4%, 4%)              |
|                    | Glass production volume               | Normal                   | (-7%, 7%)              |
|                    | Emission factor (glass production)    | Normal                   | (-5%, 4%)              |
|                    | Coal mining                           | Normal                   | (-3%, 3%)              |
|                    | Emission factor (coal mining)         | Normal                   | (-5%, 5%)              |
|                    | Oil extraction                        | Normal                   | (-3%, 3%)              |
|                    | Emission factor (oil extraction)      | Normal                   | (-1%, 1%)              |
|                    | Vanadium extraction                   | Normal                   | (-13%, 12%)            |
|                    | Emission factor (vanadium extraction) | Normal                   | (-10%, 9%)             |
| Waste disposal     | Solid waste volume                    | Normal                   | (-15%, 15%)            |
|                    | Emission factor (solid waste)         | Normal                   | (-20%, 20%)            |
|                    | MSW incineration volume               | Normal                   | (-12%, 12%)            |
|                    | Emission factor (MSW incineration)    | Normal                   | (-2%, 3%)              |
|                    | MSW landfilling volume                | Normal                   | (-2%, 2%)              |
|                    | Emission factor (landfilling)         | Normal                   | (-3%, 3%)              |
|                    | Sludge generation volume              | Normal                   | (-8%, 8%)              |
|                    | Emission factor (sludge)              | Normal                   | (-2%, 2%)              |
|                    | Wastewater generation volume          | Normal                   | (-5%, 4%)              |
|                    | Emission factor (wastewater)          | Normal                   | (-2%, 2%)              |

**Table S20.** Uncertainties of the vanadium emission for source subgroups.

| V emission source    | Average  | Standard deviation | Median   | Max     | Min      | 2.50%    | 97.50%   | Uncertainty range  |
|----------------------|----------|--------------------|----------|---------|----------|----------|----------|--------------------|
| Raw coal             | 32381.75 | 87322.22           | 31981.56 | 8959.45 | 67745.41 | 16986.05 | 49762.68 | (-47.54%, 53.68%)  |
| Coke                 | 3367     | 895.62             | 3330.99  | 573.03  | 6950.18  | 1769.41  | 5160.73  | (-47.45%, 53.27%)  |
| Crude oil            | 6218.44  | 202.44             | 6216.62  | 5516.51 | 6960.83  | 5816.29  | 6616.03  | (6.47%, 6.39%)     |
| Gasoline             | 1899.69  | 46.1               | 1899.26  | 1740.71 | 2069.03  | 1808.74  | 1990.62  | (-4.79%, 4.79%)    |
| Diesel               | 2416.18  | 116.02             | 2416.01  | 2007.62 | 2845.59  | 2185.59  | 2641.49  | (-9.54%, 9.33%)    |
| Kerosene             | 2325.48  | 20.62              | 2325.37  | 2253.16 | 2403.72  | 2285.12  | 2365.98  | (-1.74%, 1.74%)    |
| Fuel oil             | 4343.95  | 347.46             | 4343.65  | 3120.95 | 5631.6   | 3652.13  | 5018.09  | (-15.93%, -15.52%) |
| Gasoline (mobile)    | 9.82     | 1.04               | 9.82     | 6.18    | 13.66    | 7.75     | 11.83    | (-21.08%, 20.47%)  |
| Diesel (mobile)      | 1313.89  | 48.99              | 1313.58  | 1141.55 | 1495.77  | 1216.19  | 1408.42  | (-7.44%, 7.19%)    |
| Fuel oil (mobile)    | 78.5     | 3.16               | 78.48    | 67.38   | 90.23    | 72.19    | 84.6     | (-8.04%, 7.77%)    |
| Steelmaking          | 37.24    | 0.74               | 37.24    | 34.53   | 39.92    | 35.78    | 38.68    | (-3.92%, 3.87%)    |
| Glass production     | 279      | 17.63              | 278.99   | 213.83  | 343.34   | 243.86   | 313.51   | (-12.59%, 12.37%)  |
| Coal mining          | 81.2     | 1.14               | 81.2     | 77      | 85.35    | 78.93    | 83.43    | (-2.80%, -2.75%)   |
| Oil extraction       | 39.46    | 1.92               | 39.46    | 32.38   | 46.45    | 35.64    | 43.21    | (-9.68%, 9.50%)    |
| Vanadium mining      | 29.1     | 0.57               | 29.1     | 26.99   | 31.19    | 27.96    | 30.22    | (-3.92%, 3.85%)    |
| Solid waste disposal | 804.48   | 31.7               | 804.04   | 696.32  | 928.15   | 742.97   | 867.34   | (-7.65%, 7.81%)    |
| MSW incineration     | 1517.89  | 52.21              | 1517.35  | 1341.56 | 1727.03  | 1416.42  | 1620.63  | (-6.68%, 6.77%)    |
| MSW landfilling      | 1203.28  | 68.5               | 1203.14  | 962.72  | 1453.08  | 1066.24  | 1338.54  | (-11.39%, 11.24%)  |
| Wastewater sludge    | 284.31   | 11.91              | 284.3    | 240.28  | 327.77   | 260.57   | 307.62   | (-8.35%, 8.20%)    |
| Wastewater discharge | 0.0176   | 0.0004             | 0.0175   | 0.0159  | 0.0192   | 0.0167   | 0.0185   | (-5.50%, 4.43%)    |

Figure S1-S3

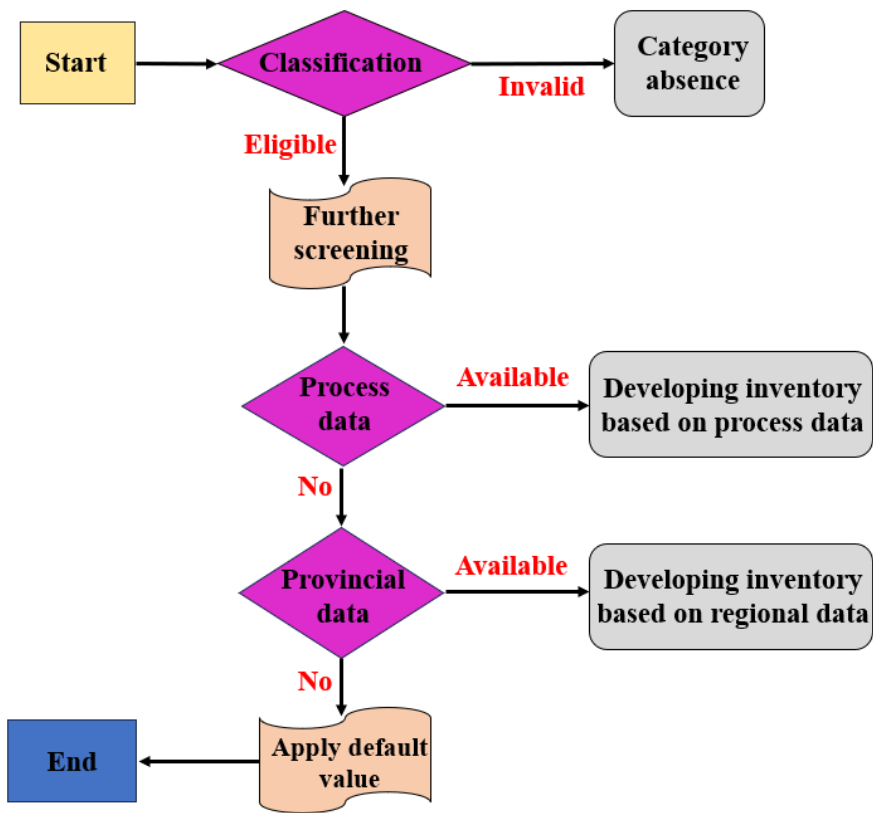

Figure S1. Decision tree for developing the emission inventory.

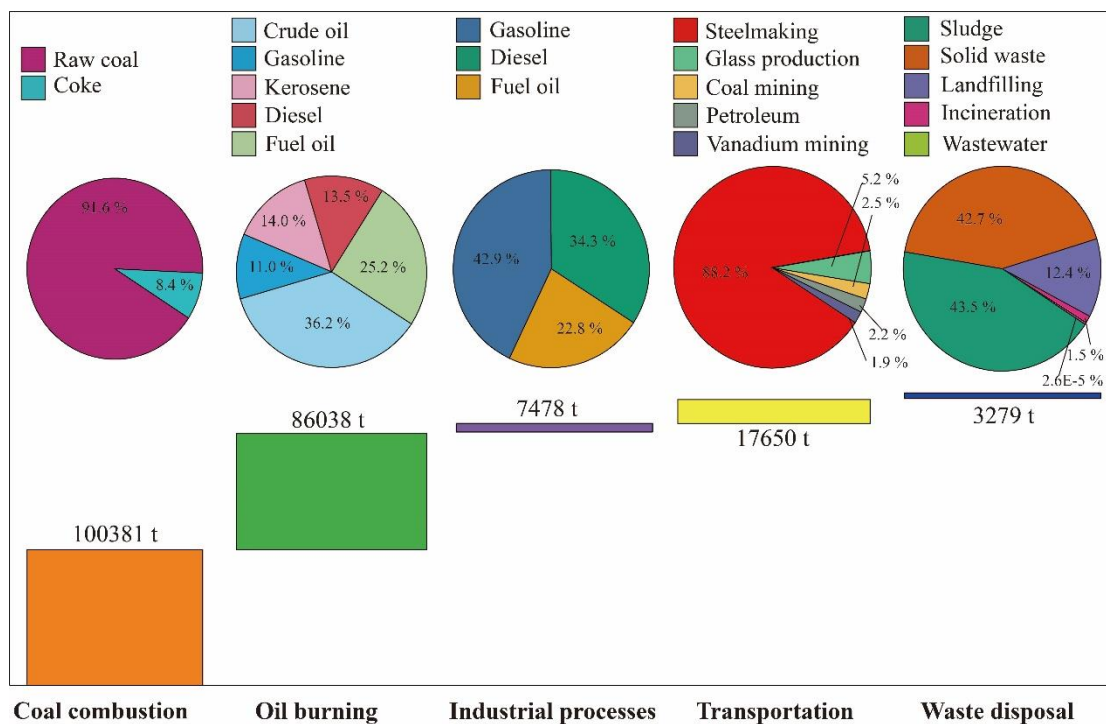

**Figure S2.** Cumulative vanadium emission pertinent to major categories and contribution fraction by subgroups under each category.

(a) V emission in all categories

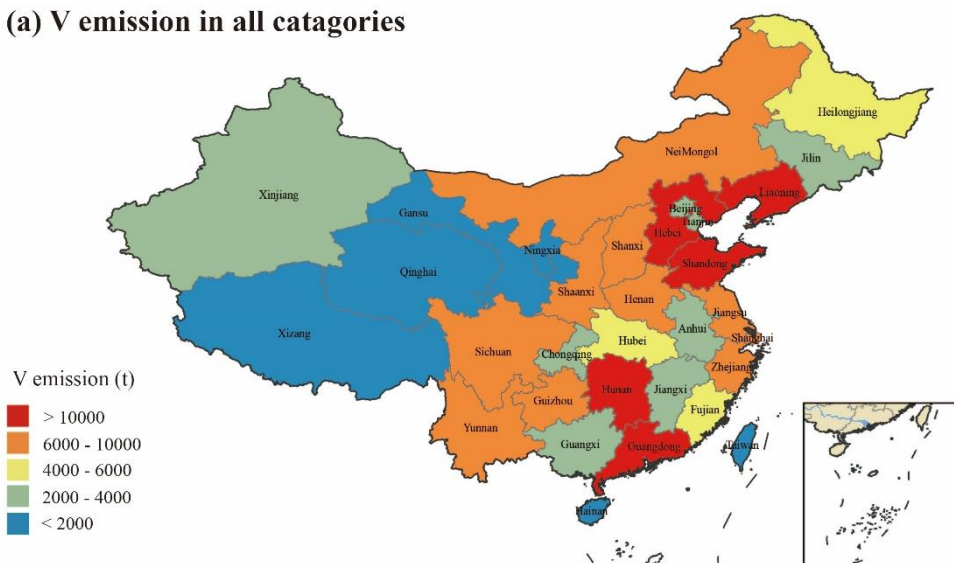

(b) Coal combustion

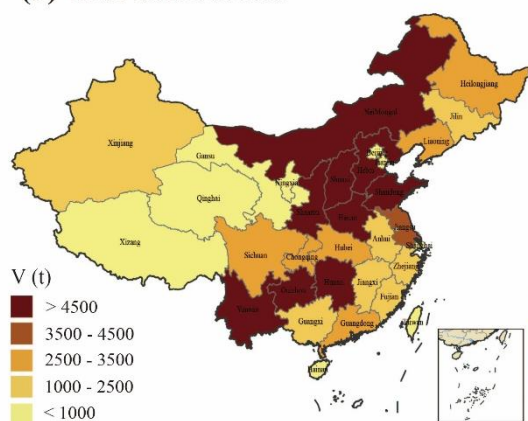

(c) Stationary oil burning

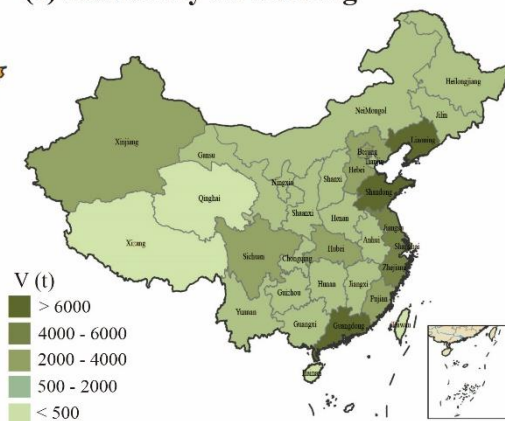

(d) Industrial process

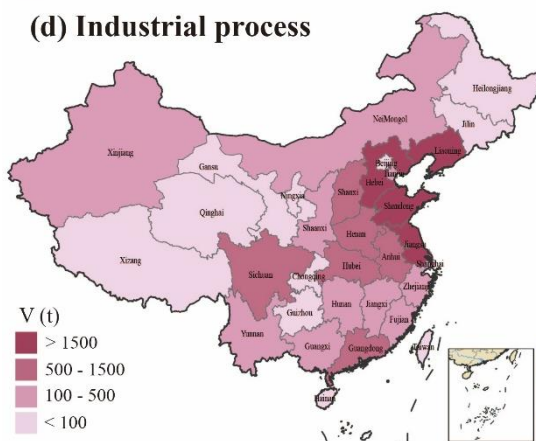

(e) Waste disposal

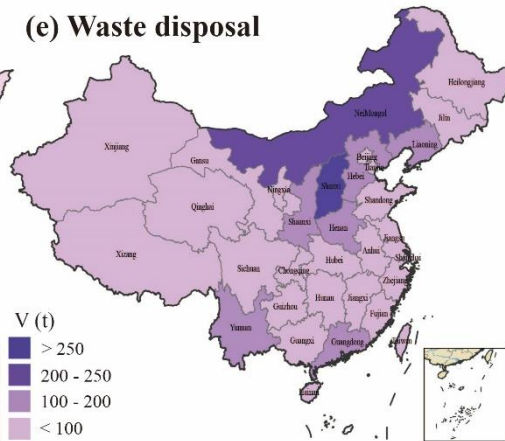

**Figure S3.** Province-resolute spatial variation in cumulative vanadium emission during 2015-2019 for (a) all source categories, (b) coal combustion, (c) stationary oil burning, (d) industrial process, and (e) waste disposal.

## Reference

- Bhatnagar, A., Minocha, A., Pudasainee, D., Chung, H.: Vanadium removal from water by waste metal sludge and cement immobilization, *Chem. Eng. J.* 144, 197-204, 2008
- Bai, X., Luo, L., Tian, H., Liu, S., Hao, Y., Zhao, S., Lin, S., Zhu, C., Guo, Z., Lv, Y.: Atmospheric Vanadium Emission Inventory from Both Anthropogenic and Natural Sources in China, *Environ. Sci. & Technol.*, 55, 11568-11578, 2021
- Bhuiyan, B., Parvez, L., Islam, M., Dampare, S., Suzuki, S.: Heavy metal pollution of coal mine-affected agricultural soils in the northern part of Bangladesh. *J. Hazard. Mat.* 173, 384-392, 2010.
- Blokhina, T., Karpenko, O.: Heavy metals pollution of a solid waste landfill, *E3S Web of Conferences* 116, 00010, 2019.
- Bulletin on the second national general survey of pollution sources (in Chinese, fiscal year: 2017) [data set], National Bureau of Statistics of China, and Ministry of Agriculture and Rural Affairs of the People's Republic of China, [www.gov.cn/xinwen/2020-06/10/content\\_5518391.htm](http://www.gov.cn/xinwen/2020-06/10/content_5518391.htm).2020, 2020.
- Chen, Y., Liu, G., Gong, Y., Yang, J., Qi, C., Gao, L.: Release and enrichment of 44 elements during coal pyrolysis of Yima coal, China. *J. Analyt. Appl. Pyrol.*, 80, 283-288, 2007.
- Hao, L., Zhang, B., Feng, C., Zhang, Z., Lei, Z., Shimizu, K.: Human health risk of vanadium in farmland soils near various vanadium ore mining areas and bioremediation assessment, *Chemosphere*, 263, 128246, 2021.
- Helble, J., Mojtahedi, W., Lyyräinen, J., Jokiniemi, J., Kauppinen, E.: Trace element partitioning during coal gasification, *Fuel*, 75, 931-939, 1996.
- Hope, B. K. A dynamic model for the global cycling of anthropogenic vanadium, *Global Biogeochem. Cycles*, 22, 1–16.(15), 2008.
- Koniecznyński, J., Zajusz-Zubek, E., Jabłońska, M.: The Release of Trace Elements in the Process of Coal Coking. *Sci. World J.*, 294927, 2012.
- Kuenen, J., van der Most, P., Rentz, O., Nunge, S., Trozzi, C., Pulles, T., Appelman, W.: EMEP/EEA air pollutant emission inventory guidebook 2016, European Environment Agency, 2016.

Lashari, A., Kazi, T., Afridi, H., Baig, J., Arain, M., Lashari, A., Kandhro, F.: Impact of oil well drilling activities on vanadium in soil, ground water, vegetables, fruits, and feed crops: a risk assessment, *Int. J. Environ. Sci. Technol.*, 20, 11963-11972, 2023.

Lee, S., Wu, C.: Study of vanadium emission control in combustion systems by thermodynamic equilibrium analyses, *Adv. Environ. Res.*, 7, 1-10, 2002.

Lin, K., Huang, W., Finkelman, R., Chen, J., Yi, S., Cui, X., Wang, Z.: Distribution, modes of occurrence, and main factors influencing lead enrichment in Chinese coals, *Int. J. Coal Sci. & Technol.* 7, 1-18, 2020.

Liu, Z., Ottinger, N., Creameens, C.: Vanadium and tungsten release from V-based selective catalytic reduction diesel aftertreatment, *Atmos. Environ.*, 104, 154-161, 2015.

Lundkvist, K., Brämning, M., Larsson, M., Samuelsson, C.: System analysis of slag utilisation from vanadium recovery in an integrated steel plant, *J. Clean. Prod.*, 47, 43-51, 2013.

Moreno, T., Querol, X., Alastuey, A., De la Rosa, J., Sánchez, AM, Minguillón, M., Pandolfi, M., González-Castanedo, Y., Monfort, E., Gibbons, W.: Variations in vanadium, nickel and lanthanoid element concentrations in urban air, *Sci. Total Environ.*, 408(20):4569-4579, 2010.

Mukherjee, T., Gupta, C.: Extraction of Vanadium from an Industrial Waste., *High Temperature Materials and Processes*, 11, 1-4, 1993.

Nriagu, J., Pacyna, J.: Quantitative assessment of worldwide contamination of air, water and soils by trace metals, *Nature* 333, 134-139, 1988.

Pacyna, J. M.; Pacyna, E. G.: An assessment of global and regional emissions of trace metals to the atmosphere from anthropogenic sources worldwide, *Environ. Rev.* 9, 269–298, 2001.

Pacyna, E., Pacyna, J., Fudala, J., Strzelecka-Jastrzab, E., Hlawiczka, S., Panasiuk, D., Nitter, S., Pregger, T., Pfeiffer, H., Friedrich, R.: Current and future emissions of selected heavy metals to the atmosphere from anthropogenic sources in Europe, *Atmos. Environ.*, 41, 8557-8566, 2007.

Pasko, O., Mochalova, T.: Toxicity Assessment of Contaminated Soils of Solid Domestic Waste Landfill, *IOP Conf. Ser.: Earth Environ. Sci.*, 21 012044, 2014.

Schlesinger, W. H.; Klein, E. M.; Vengosh, A.: Global biogeochemical cycle of vanadium, *Proc. Natl. Acad. Sci. U. S. A.*, 114, 11092–11100, 2017.

Spada, N., Cheng, X., White, W., Hyslop, N.: Decreasing Vanadium Footprint of Bunker Fuel Emissions, *Environ. Sci. Technol.* 52, 11528-11534, 2018.

Tian, H.Z., Wang, Y., Xue, Z.G., Cheng, K., Qu, Y.P., Chai, F.H., Hao, J.M.: Trend and characteristics of atmospheric emissions of Hg, As, and Se from coal combustion in China, 1980e2007, *Atmos. Chem. and Phy*, 10, 11905e11919, 2010.

Tian, H., Cheng, K., Wang, Y., Zhao, D., Long, L., Jia, W., Hao, J.: Temporal and spatial variation characteristics of atmospheric emissions of Cd, Cr, and Pb from coal in China, *Atmos. Environ.*, 50, 157-163., 2012.

Tian, H., Zhu, C., Gao, J., Cheng, K., Hao, J., Wang, K., Hua, S., Wang, Y., Zhou, J.: Quantitative assessment of atmospheric emissions of toxic heavy metals from anthropogenic sources in China: historical trend, spatial variation distribution, uncertainties and control policies, *Atmos. Chem. Phys. Discuss.*, 15, 12107-12166, 2015.

Topal, M., Topal, E.: Investigation of Critical Raw Materials in Sludge of Municipal Wastewater Treatment Plant, *Arabian J. for Sci. and Eng.*, 48, 107-115, 2023.

Visschedijk, A., Denier van der Gon, H., Hulskotte, J., Quass, U.: Anthropogenic Vanadium emissions to air and ambient air concentrations in North-West Europe, *E3S Web of Conferences* 1, 23 April 2013, 03004., 2013.

Yearbook of Transportation and Automobile Industry 2015-2019, National Bureau of Statistics of China [Data set], <http://www.stats.gov.cn/tjsj/ndsj/>, 2020.

Zhang, H.: Dataset for Emission Inventory Development for Spatiotemporal Release of Vanadium from Anthropogenic Sources in China [Data set]. Zenodo, <https://doi.org/10.5281/zenodo.10565560>, 2024.
